# Supplementary material for: When Sarcoma Strikes the Jaw: A Rare Case of Intraosseous Synovial Sarcoma
Source: Research Square preprint supplement (doi:10.21203/rs.3.rs-7151019/v1), 2025-08-20
Supplement: Supplementary file 1 [file 31c0fe175bca3d4c0c85c251.pdf]

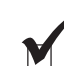

| Topic                               | Item       | Checklist item description                                                                                      | Reported on Line |
|-------------------------------------|------------|-----------------------------------------------------------------------------------------------------------------|------------------|
| <b>Title</b>                        | <b>1</b>   | The diagnosis or intervention of primary focus followed by the words “case report” . . . . .                    | Page 1_____      |
| <b>Key Words</b>                    | <b>2</b>   | 2 to 5 key words that identify diagnoses or interventions in this case report, including "case report" .....    | Page 2_____      |
| <b>Abstract<br/>(no references)</b> | <b>3a</b>  | Introduction: What is unique about this case and what does it add to the scientific literature? .....           | Page 2_____      |
|                                     | <b>3b</b>  | Main symptoms and/or important clinical findings . . . . .                                                      | Page 2_____      |
|                                     | <b>3c</b>  | The main diagnoses, therapeutic interventions, and outcomes .....                                               | Page 2_____      |
|                                     | <b>3d</b>  | Conclusion—What is the main “take-away” lesson(s) from this case? .....                                         | Page 2_____      |
| <b>Introduction</b>                 | <b>4</b>   | One or two paragraphs summarizing why this case is unique ( <b>may include</b> references) .....                | Page 3_____      |
| <b>Patient Information</b>          | <b>5a</b>  | De-identified patient specific information .....                                                                | Page 3_____      |
|                                     | <b>5b</b>  | Primary concerns and symptoms of the patient .....                                                              | Page 3_____      |
|                                     | <b>5c</b>  | Medical, family, and psycho-social history including relevant genetic information .....                         | Page 3_____      |
|                                     | <b>5d</b>  | Relevant past interventions with outcomes.....                                                                  | Page 3_____      |
| <b>Clinical Findings</b>            | <b>6</b>   | Describe significant physical examination (PE) and important clinical findings.....                             | Page 3_____      |
| <b>Timeline</b>                     | <b>7</b>   | Historical and current information from this episode of care organized as a timeline .....                      | Page 3_____      |
| <b>Diagnostic<br/>Assessment</b>    | <b>8a</b>  | Diagnostic testing (such as PE, laboratory testing, imaging, surveys).....                                      | Page 3_____      |
|                                     | <b>8b</b>  | Diagnostic challenges (such as access to testing, financial, or cultural) .....                                 | Page 3_____      |
|                                     | <b>8c</b>  | Diagnosis (including other diagnoses considered) .....                                                          | Page 3_____      |
|                                     | <b>8d</b>  | Prognosis (such as staging in oncology) where applicable.....                                                   | Page 3_____      |
| <b>Therapeutic<br/>Intervention</b> | <b>9a</b>  | Types of therapeutic intervention (such as pharmacologic, surgical, preventive, self-care) . . . . .            | Page 3_____      |
|                                     | <b>9b</b>  | Administration of therapeutic intervention (such as dosage, strength, duration) .....                           | Page 3_____      |
|                                     | <b>9c</b>  | Changes in therapeutic intervention (with rationale) .....                                                      | Page 3_____      |
| <b>Follow-up and<br/>Outcomes</b>   | <b>10a</b> | Clinician and patient-assessed outcomes (if available).....                                                     | Page 3_____      |
|                                     | <b>10b</b> | Important follow-up diagnostic and other test results .....                                                     | Page 3_____      |
|                                     | <b>10c</b> | Intervention adherence and tolerability (How was this assessed?).....                                           | Page 3_____      |
|                                     | <b>10d</b> | Adverse and unanticipated events .....                                                                          | N/A_____         |
| <b>Discussion</b>                   | <b>11a</b> | A scientific discussion of the strengths AND limitations associated with this case report.....                  | Page 4_____      |
|                                     | <b>11b</b> | Discussion of the relevant medical literature <b>with references</b> .....                                      | Page 4_____      |
|                                     | <b>11c</b> | The scientific rationale for any conclusions (including assessment of possible causes).....                     | Page 4_____      |
|                                     | <b>11d</b> | The primary “take-away” lessons of this case report (without references) in a one paragraph conclusion.....     | Page 4_____      |
| <b>Patient Perspective</b>          | <b>12</b>  | The patient should share their perspective in one to two paragraphs on the treatment(s) they received . . . . . | N/A_____         |

**Informed Consent**

**13** Did the patient give informed consent? Please provide if requested .....

Yes ☒ No ☐
